# Supplementary material for: Surface–atmosphere fluxes of volatile organic compounds in Beijing
Source: Copernicus journal article supplement (doi:10.5194/acp-20-15101-2020), 2020-12-07
Supplement: Supplementary file 1 [file acp-20-15101-2020-supplement.pdf]

Supplement of Atmos. Chem. Phys., 20, 15101–15125, 2020  
<https://doi.org/10.5194/acp-20-15101-2020-supplement>  
© Author(s) 2020. This work is distributed under  
the Creative Commons Attribution 4.0 License.

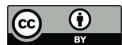

*Supplement of*

## **Surface–atmosphere fluxes of volatile organic compounds in Beijing**

**W. Joe F. Acton et al.**

*Correspondence to:* W. Joe F. Acton ([w.j.f.acton@bham.ac.uk](mailto:w.j.f.acton@bham.ac.uk))

The copyright of individual parts of the supplement might differ from the CC BY 4.0 License.

Table 1: PTR-ToF-MS Sensitivity

| Compound               | Average sensitivity (ncps/ppb)<br>winter campaign | Average sensitivity (ncps/ppb)<br>summer campaign |
|------------------------|---------------------------------------------------|---------------------------------------------------|
| methanol               | 8.48                                              | 6.41                                              |
| acetonitrile           | 18.69                                             | 19.01                                             |
| ethanol                | 0.83                                              | 1.57                                              |
| 1,3-butadiene          | 9.98                                              | 9.86                                              |
| acetone                | 21.67                                             | 24.78                                             |
| isoprene               | 10.21                                             | 10.15                                             |
| butenone               | 20.37                                             | 19.58                                             |
| butan-2-one            | 20.85                                             | 22.97                                             |
| benzene                | 14.99                                             | 15.35                                             |
| toluene                | 15.83                                             | 17.10                                             |
| m-xylene               | 18.01                                             | 19.91                                             |
| 1,2,4-trimethylbenzene | 17.56                                             | 18.79                                             |

Table 2: Mass/charge ratio and likely chemical composition of the 64 masses showing a flux with a median relative random error of less than 150% in the summer campaign.

| m/z [amu] | Chemical formula                                                                                 | m/z [amu] | Chemical formula                                               |
|-----------|--------------------------------------------------------------------------------------------------|-----------|----------------------------------------------------------------|
| 31.018    | (CH <sub>2</sub> O)H <sup>+</sup>                                                                | 87.052    | (C <sub>4</sub> H <sub>6</sub> O <sub>2</sub> )H <sup>+</sup>  |
| 33.033    | (CH <sub>4</sub> O)H <sup>+</sup>                                                                | 87.074    | (C <sub>5</sub> H <sub>10</sub> O)H <sup>+</sup>               |
| 40.974    | Unassigned                                                                                       | 89.048    | (C <sub>4</sub> H <sub>8</sub> S)H <sup>+</sup>                |
| 41.039    | (C <sub>3</sub> H <sub>5</sub> )H <sup>+</sup>                                                   | 92.953    | Unassigned                                                     |
| 42.034    | (C <sub>2</sub> H <sub>3</sub> N)H <sup>+</sup>                                                  | 93.071    | (C <sub>7</sub> H <sub>8</sub> )H <sup>+</sup>                 |
| 43.018    | (C <sub>2</sub> H <sub>2</sub> O)H <sup>+</sup>                                                  | 95.037    | (C <sub>5</sub> H <sub>4</sub> NO)H <sup>+</sup>               |
| 43.054    | (C <sub>3</sub> H <sub>6</sub> )H <sup>+</sup>                                                   | 96.979    | Unassigned                                                     |
| 45.033    | (C <sub>2</sub> H <sub>4</sub> O)H <sup>+</sup>                                                  | 97.097    | (C <sub>7</sub> H <sub>12</sub> )H <sup>+</sup>                |
| 46.030    | (CH <sub>3</sub> NO)H <sup>+</sup>                                                               | 99.073    | (C <sub>6</sub> H <sub>10</sub> O)H <sup>+</sup>               |
| 47.032    | (CH <sub>2</sub> O <sub>2</sub> )H <sup>+</sup> /(C <sub>2</sub> H <sub>6</sub> O)H <sup>+</sup> | 100.998   | Unassigned                                                     |
| 51.041    | Unassigned                                                                                       | 101.029   | (C <sub>4</sub> H <sub>4</sub> O <sub>3</sub> )H <sup>+</sup>  |
| 55.053    | (C <sub>4</sub> H <sub>6</sub> )H <sup>+</sup>                                                   | 101.071   | (C <sub>5</sub> H <sub>8</sub> O <sub>2</sub> )H <sup>+</sup>  |
| 57.044    | (C <sub>3</sub> H <sub>4</sub> O)H <sup>+</sup>                                                  | 101.109   | (C <sub>6</sub> H <sub>12</sub> O)H <sup>+</sup>               |
| 57.081    | (C <sub>4</sub> H <sub>8</sub> )H <sup>+</sup>                                                   | 105.071   | (C <sub>8</sub> H <sub>8</sub> )H <sup>+</sup>                 |
| 59.064    | (C <sub>3</sub> H <sub>6</sub> O)H <sup>+</sup>                                                  | 107.081   | (C <sub>8</sub> H <sub>10</sub> )H <sup>+</sup>                |
| 61.030    | (C <sub>2</sub> H <sub>4</sub> O <sub>2</sub> )H <sup>+</sup>                                    | 107.949   | Unassigned                                                     |
| 63.022    | (C <sub>2</sub> H <sub>6</sub> S)H <sup>+</sup>                                                  | 111.111   | (C <sub>8</sub> H <sub>15</sub> )H <sup>+</sup>                |
| 67.066    | (C <sub>5</sub> H <sub>6</sub> )H <sup>+</sup>                                                   | 119.083   | (C <sub>9</sub> H <sub>10</sub> )H <sup>+</sup>                |
| 69.078    | (C <sub>5</sub> H <sub>8</sub> )H <sup>+</sup>                                                   | 120.942   | Unassigned                                                     |
| 71.058    | (C <sub>4</sub> H <sub>6</sub> O)H <sup>+</sup>                                                  | 121.090   | (C <sub>9</sub> H <sub>12</sub> )H <sup>+</sup>                |
| 73.062    | (C <sub>4</sub> H <sub>8</sub> O)H <sup>+</sup>                                                  | 123.110   | (C <sub>9</sub> H <sub>14</sub> )H <sup>+</sup>                |
| 75.050    | (C <sub>3</sub> H <sub>6</sub> O <sub>2</sub> )H <sup>+</sup>                                    | 129.071   | (C <sub>10</sub> H <sub>8</sub> )H <sup>+</sup>                |
| 78.991    | Unassigned                                                                                       | 129.111   | (C <sub>7</sub> H <sub>14</sub> NO)H <sup>+</sup>              |
| 79.061    | (C <sub>6</sub> H <sub>6</sub> )H <sup>+</sup>                                                   | 135.110   | (C <sub>10</sub> H <sub>14</sub> )H <sup>+</sup>               |
| 80.974    | Unassigned                                                                                       | 137.014   | (C <sub>8</sub> H <sub>5</sub> Cl)H <sup>+</sup>               |
| 80.999    | Unassigned                                                                                       | 137.057   | (C <sub>8</sub> H <sub>8</sub> O <sub>2</sub> )H <sup>+</sup>  |
| 81.073    | (C <sub>6</sub> H <sub>8</sub> )H <sup>+</sup>                                                   | 137.134   | (C <sub>10</sub> H <sub>16</sub> )H <sup>+</sup>               |
| 82.989    | Unassigned                                                                                       | 146.974   | Unassigned                                                     |
| 83.087    | (C <sub>6</sub> H <sub>10</sub> )H <sup>+</sup>                                                  | 147.109   | (C <sub>11</sub> H <sub>14</sub> )H <sup>+</sup>               |
| 84.950    | Unassigned                                                                                       | 148.984   | Unassigned                                                     |
| 85.068    | (C <sub>5</sub> H <sub>8</sub> O)H <sup>+</sup>                                                  | 149.075   | (C <sub>7</sub> H <sub>13</sub> ClO)H <sup>+</sup>             |
| 87.029    | (C <sub>4</sub> H <sub>6</sub> S)H <sup>+</sup>                                                  | 180.942   | (C <sub>6</sub> H <sub>3</sub> Cl <sub>3</sub> )H <sup>+</sup> |
